# Supplementary material for: Viral regulation of host cell biology by hijacking of the nucleolar DNA-damage response
Source: PubMed Central journal article supplement (PMC6076271; doi:10.1038/s41467-018-05354-7), 2018-08-03
Supplement: 41467_2018_5354_MOESM3_ESM.pdf [file 41467_2018_5354_MOESM3_ESM.pdf]

## **Description of Additional Supplementary Files**

### **File Name: Supplementary Movie 1**

**Description:** Video of a 3D image of a living HeLa cell expressing GFP-HeV M and RFP-FBL (nucleolar marker). Images were acquired using a Leica SP8 microscope with Hyvolution (pinhole at 0.5 Airy units), using 4 x line averages with high sensitivity HyD detectors, and then deconvolved using Huygens (SVI, Netherlands).

### **File Name: Supplementary Movie 2**

**Description:** Video generated using the 3D *d*STORM image shown in Fig. 5A.

### **File Name: Supplementary Data 1**

**Description: Proteins identified using mass spectrometry.**

HeV M wt or HeV K258A M were immunoprecipitated from HEK-293T cells before analysis of interactome by MS as described in materials and methods.
